# Supplementary material for: Use of Parabens (Methyl and Butyl) during the Gestation Period: Mitochondrial Bioenergetics of the Testes and Antioxidant Capacity Alterations in Testes and Other Vital Organs of the F1 Generation
Source: PubMed Central journal article supplement (PMC7766258; doi:10.3390/antiox9121302), 2020-12-18
Supplement: antioxidants-09-01302-s001.pdf [file antioxidants-09-01302-s001.pdf]

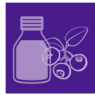

**Table S1.** Means (M), standard deviations (SD) and univariate effects of the different antioxidant enzymes and GSH/GSSG ratio by concentration in the liver. The results with different letters mean that they are statistically different from each other ( $p < 0.05$ ).

| ENZYMES        | Liver                        |                              |                              |                              |                             | F     | p      |
|----------------|------------------------------|------------------------------|------------------------------|------------------------------|-----------------------------|-------|--------|
|                | CTRL                         | MP-100                       | MP-200                       | BP-100                       | BP-200                      |       |        |
|                | M ± SD                       | M ± SD                       | M ± SD                       | M ± SD                       | M ± SD                      |       |        |
| SOD            | 1.51 ± 0.25 <sup>a</sup>     | 1.75 ± 0.23 <sup>a</sup>     | 1.64 ± 0.28 <sup>a</sup>     | 1.74 ± 0.16 <sup>a</sup>     | 1.64 ± 0.29 <sup>a</sup>    | 1.267 | 0.302  |
| CAT            | 939.43 ± 157.90 <sup>a</sup> | 829.75 ± 115.53 <sup>a</sup> | 669.21 ± 154.64 <sup>b</sup> | 826.82 ± 152.03 <sup>a</sup> | 714.80 ± 72.99 <sup>b</sup> | 5.599 | 0.002  |
| GR             | 1.55 ± 0.30 <sup>a</sup>     | 1.48 ± 0.28 <sup>a</sup>     | 1.20 ± 0.36 <sup>a</sup>     | 1.28 ± 0.25 <sup>a</sup>     | 1.21 ± 0.23 <sup>a</sup>    | 2.493 | 0.061  |
| GST            | 0.25 ± 0.05 <sup>a,b</sup>   | 0.22 ± 0.03 <sup>a,b</sup>   | 0.21 ± 0.04 <sup>a</sup>     | 0.21 ± 0.01 <sup>a</sup>     | 0.26 ± 0.02 <sup>b</sup>    | 3.842 | 0.011  |
| GSH/GSSG       | 6.21 ± 1.05 <sup>a</sup>     | 5.79 ± 0.53 <sup>a,b</sup>   | 4.54 ± 0.62 <sup>c</sup>     | 5.08 ± 0.65 <sup>b,c</sup>   | 4.51 ± 0.46 <sup>c</sup>    | 9.485 | <0.001 |
| Hydroperoxides | 65.49 ± 6.09 <sup>a</sup>    | 72.25 ± 7.21 <sup>a</sup>    | 77.10 ± 6.45 <sup>a</sup>    | 74.47 ± 10.34 <sup>a</sup>   | 94.55 ± 9.72 <sup>b</sup>   | 8.831 | <0.001 |

**Table S2.** Means (M), standard deviations (SD) and univariate effects of the different antioxidant enzymes and GSH/GSSG ratio by concentration in the kidney. The results with different letters mean that they are statistically different from each other ( $p < 0.05$ ).

| ENZYMES        | Kidney                        |                              |                                |                              |                                | F      | p      |
|----------------|-------------------------------|------------------------------|--------------------------------|------------------------------|--------------------------------|--------|--------|
|                | CTRL                          | MP-100                       | MP-200                         | BP-100                       | BP-200                         |        |        |
|                | M ± SD                        | M ± SD                       | M ± SD                         | M ± SD                       | M ± SD                         |        |        |
| SOD            | 1.84 ± 0.18 <sup>a</sup>      | 1.54 ± 0.16 <sup>b</sup>     | 1.65 ± 0.14 <sup>a,b</sup>     | 1.77 ± 0.19 <sup>a,b</sup>   | 1.84 ± 0.12 <sup>a</sup>       | 4.692  | 0.005  |
| CAT            | 6499.8 ± 932.9 <sup>a,b</sup> | 6758.0 ± 1716.5 <sup>b</sup> | 6275.0 ± 1126.4 <sup>a,b</sup> | 4351.0 ± 1279.6 <sup>a</sup> | 4514.7 ± 1442.1 <sup>a,b</sup> | 4.526  | 0.007  |
| GR             | 2.68 ± 0.54 <sup>a</sup>      | 3.64 ± 0.52 <sup>b</sup>     | 4.85 ± 0.82 <sup>c</sup>       | 3.31 ± 0.53 <sup>a,b</sup>   | 3.75 ± 0.94 <sup>b</sup>       | 13.055 | <0.001 |
| GST            | 0.58 ± 0.15 <sup>a</sup>      | 0.55 ± 0.09 <sup>a</sup>     | 0.77 ± 0.07 <sup>b</sup>       | 0.66 ± 0.09 <sup>a,b</sup>   | 0.83 ± 0.11 <sup>b</sup>       | 8.005  | <0.011 |
| GSH/GSSG       | 3.96 ± 0.61 <sup>a</sup>      | 3.93 ± 0.39 <sup>a</sup>     | 3.83 ± 0.37 <sup>a</sup>       | 4.14 ± 0.56 <sup>a</sup>     | 4.09 ± 0.39 <sup>a</sup>       | 0.422  | 0.791  |
| Hydroperoxides | 81.1 ± 14.6 <sup>a</sup>      | 107.9 ± 9.4 <sup>b,c</sup>   | 117.6 ± 8.2 <sup>b</sup>       | 98.8 ± 12.8 <sup>a,c</sup>   | 101.3 ± 6.8 <sup>b,c</sup>     | 7.803  | 0.001  |

**Table S3.** Means (M), standard deviations (SD) and univariate effects of the different antioxidant enzymes and GSH/GSSG ratio by concentration in the heart. The results with different letters mean that they are statistically different from each other ( $p < 0.05$ ).

| ENZYMES        | Heart                        |                                |                                |                              |                              | F      | p      |
|----------------|------------------------------|--------------------------------|--------------------------------|------------------------------|------------------------------|--------|--------|
|                | CTRL                         | MP-100                         | MP-200                         | BP-100                       | BP-200                       |        |        |
|                | M ± SD                       | M ± SD                         | M ± SD                         | M ± SD                       | M ± SD                       |        |        |
| SOD            | 1.6 ± 0.3 <sup>a</sup>       | 1.5 ± 0.2 <sup>a</sup>         | 1.3 ± 0.3 <sup>a</sup>         | 1.6 ± 0.3 <sup>a</sup>       | 1.3 ± 0.3 <sup>a</sup>       | 1.952  | 0.128  |
| CAT            | 6.40 ± 0.90 <sup>a</sup>     | 9.29 ± 2.48 <sup>b</sup>       | 10.85 ± 1.07 <sup>b,c</sup>    | 11.89 ± 1.12 <sup>c,d</sup>  | 13.79 ± 1.28 <sup>d</sup>    | 25.041 | <0.001 |
| GR             | 0.0005 ± 0.0003 <sup>a</sup> | 0.0014 ± 0.0002 <sup>b,c</sup> | 0.0011 ± 0.0002 <sup>b</sup>   | 0.0016 ± 0.0004 <sup>c</sup> | 0.0022 ± 0.0004 <sup>d</sup> | 31.918 | <0.001 |
| GST            | 0.0086 ± 0.0012 <sup>a</sup> | 0.0085 ± 0.0014 <sup>a</sup>   | 0.0077 ± 0.0015 <sup>a,b</sup> | 0.0062 ± 0.0011 <sup>b</sup> | 0.0060 ± 0.0012 <sup>b</sup> | 7.822  | <0.001 |
| GSH/GSSG       | 5.34 ± 0.62 <sup>a</sup>     | 4.86 ± 0.81 <sup>a</sup>       | 5.27 ± 0.32 <sup>a</sup>       | 5.19 ± 0.66 <sup>a</sup>     | 5.29 ± 0.198 <sup>a</sup>    | 0.683  | 0.610  |
| Hydroperoxides | 80.76 ± 5.23 <sup>a</sup>    | 89.47 ± 1.36 <sup>b</sup>      | 99.01 ± 7.08 <sup>c</sup>      | 94.23 ± 4.72 <sup>b,c</sup>  | 123.99 ± 4.89 <sup>d</sup>   | 63.366 | <0.001 |

**Table S4.** Means (M), standard deviations (SD) and univariate effects of the different antioxidant enzymes and GSH/GSSG ratio by concentration in the seminal vesicles. The results with different letters mean that they are statistically different from each other ( $p < 0.05$ ).

| ENZYMES  | Seminal vesicles            |                             |                               |                               |                              | F      | p      |
|----------|-----------------------------|-----------------------------|-------------------------------|-------------------------------|------------------------------|--------|--------|
|          | CTRL                        | MP-100                      | MP-200                        | BP-100                        | BP-200                       |        |        |
|          | M ± SD                      | M ± SD                      | M ± SD                        | M ± SD                        | M ± SD                       |        |        |
| SOD      | 1.14 ± 0.09 <sup>a,c</sup>  | 0.81 ± 0.18 <sup>b</sup>    | 1.029 ± 0.27 <sup>a,b</sup>   | 1.36 ± 0.14 <sup>c</sup>      | 1.75 ± 0.09 <sup>d</sup>     | 31.635 | <0.001 |
| CAT      | 1.22 ± 0.09 <sup>a</sup>    | 1.15 ± 0.11 <sup>a</sup>    | 1.12 ± 0.21 <sup>a</sup>      | 0.89 ± 0.15 <sup>b</sup>      | 0.74 ± 0.22 <sup>b</sup>     | 12.437 | <0.001 |
| GR       | 7.22 ± 1.89 <sup>a</sup>    | 7.50 ± 2.17 <sup>a</sup>    | 5.46 ± 0.69 <sup>a,b</sup>    | 4.09 ± 0.98 <sup>b</sup>      | 3.99 ± 1.07 <sup>b</sup>     | 10.232 | <0.001 |
| GST      | 0.012 ± 0.0011 <sup>a</sup> | 0.011 ± 0.0023 <sup>a</sup> | 0.012 ± 0.0022 <sup>a,b</sup> | 0.009 ± 0.0024 <sup>b,c</sup> | 0.0078 ± 0.0025 <sup>c</sup> | 6.600  | <0.001 |
| GSH/GSSG | 5.29 ± 1.69 <sup>a</sup>    | 4.99 ± 0.96 <sup>a</sup>    | 5.07 ± 0.99 <sup>a</sup>      | 5.19 ± 1.11 <sup>a</sup>      | 4.61 ± 1.28 <sup>a</sup>     | 0.452  | 0.771  |
